# Supplementary material
Source: PubMed Central journal article supplement (PMC1959446)

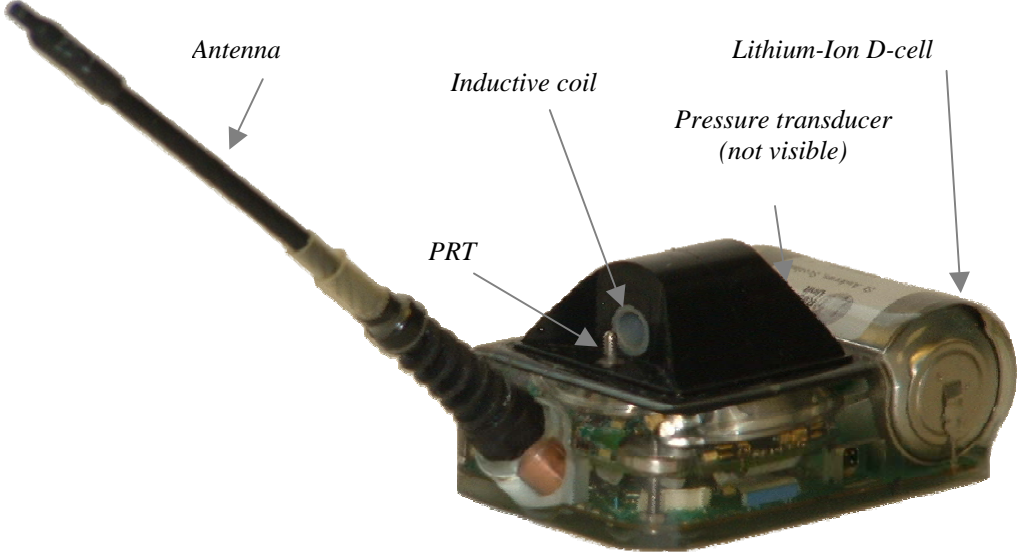

*Antenna*

*Inductive coil*

*Lithium-Ion D-cell*

*Pressure transducer  
(not visible)*

*PRT*

Supplement: pnas_0701121104_1.pdf [file pnas_0701121104_1.pdf]

Number of profiles per degree Latitude (south of 40° S)

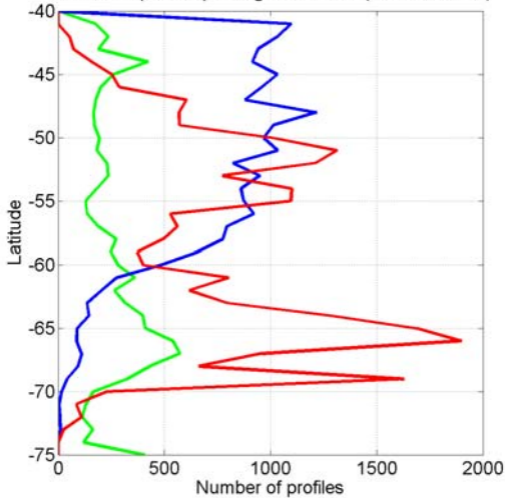

Supplement: pnas_0701121104_3.pdf [file pnas_0701121104_3.pdf]
